# Supplementary material
Source: PubMed Central journal article supplement (PMC3185068)
Supplement: supp_111393_edit-gonorrhea-1-at.pdf [file supp_111393_edit-gonorrhea-1-at.pdf]

## Appendix 1: References for the editorial “Gonorrhoea: what goes around comes around”

### References

1. Health Protection Agency. *GRASP 2008 report: trends in antimicrobial resistant gonorrhoea*. London (UK): The Agency; 2008. Available: [www.hpa.org.uk/web/HPAwebFile/HPAweb\\_C/1245914960426](http://www.hpa.org.uk/web/HPAwebFile/HPAweb_C/1245914960426) (accessed 2011 Aug. 25).
2. Kirkcaldy R, Murray E, Del Rio C, et al. Cephalosporin susceptibility of *Neisseria gonorrhoeae* isolates in the USA, 2000–2010. *Sex Transm Infect* 2011;87:A26.
3. *Surveillance of antibiotic resistance in Neisseria gonorrhoeae in the WHO western pacific and south east Asian regions, 2009*. Available: [www.health.gov.au/internet/main/publishing.nsf/Content/cda-cdi3501-pdf-cnt.htm/\\$FILE/cdi3501a.pdf](http://www.health.gov.au/internet/main/publishing.nsf/Content/cda-cdi3501-pdf-cnt.htm/$FILE/cdi3501a.pdf) (accessed 2011 Aug. 25).
4. Cole M, Chisholm S, Unemo M, et al. European gonococcal antimicrobial surveillance program (EURO–GASP): towards timelier monitoring. *Sex Transm Infect* 2010;86:e427-32.
5. Ohnishi M, Saika T, Hoshina S, et al. Ceftriaxone-resistant *Neisseria gonorrhoeae*, Japan. *Emerg Infect Dis* 2011;17:148-9.
6. Ison CA, Hussey J, Sankar KN, et al. Gonorrhoea treatment failures to cefixime and azithromycin in England, 2010. *Euro Surveill* 2011;16;pii:19833. Available: [www.eurosurveillance.org/images/dynamic/EE/V16N14/V16N14.pdf](http://www.eurosurveillance.org/images/dynamic/EE/V16N14/V16N14.pdf) (accessed 2011 Aug. 22).
